# Supplementary material
Source: PubMed Central journal article supplement (PMC6152879)
Supplement: NIHMS1503487-supplement-1.pdf [file NIHMS1503487-supplement-1.pdf]

**Cell Reports, Volume 24**

**Supplemental Information**

**Successful Reorganization of Category-Selective**

**Visual Cortex following Occipito-temporal**

**Lobectomy in Childhood**

**Tina T. Liu, Adrian Nestor, Mark D. Vida, John A. Pyles, Christina Patterson, Ying Yang, Fan Nils Yang, Erez Freud, and Marlene Behrmann**

**A.**

**1. Visual task:**  
(spinning circle - crosshair)

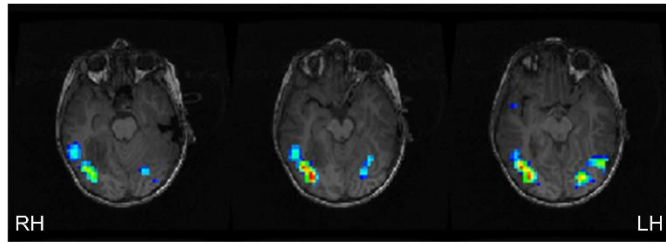

**2. Verb generation task:**  
(nouns – random noise)

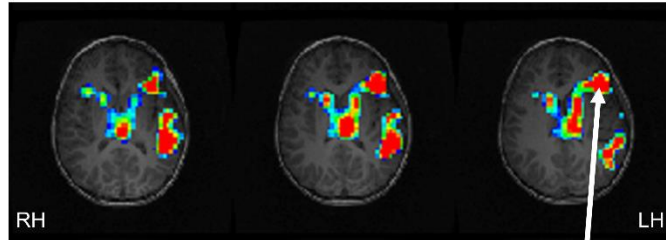

**B.**

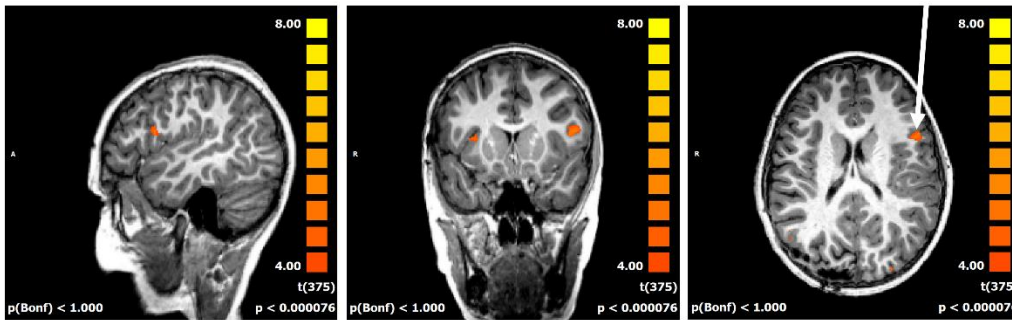

Figure S1. Pre- and post-surgical language mapping results. Related to Figure 1.  
(A) Tasks and results from the pre-surgical clinical/functional localizer: (1) visual task and (2) language/verb generation task.  
(B) Results from the post-surgical language localizer (Fedorenko et al., 2010).

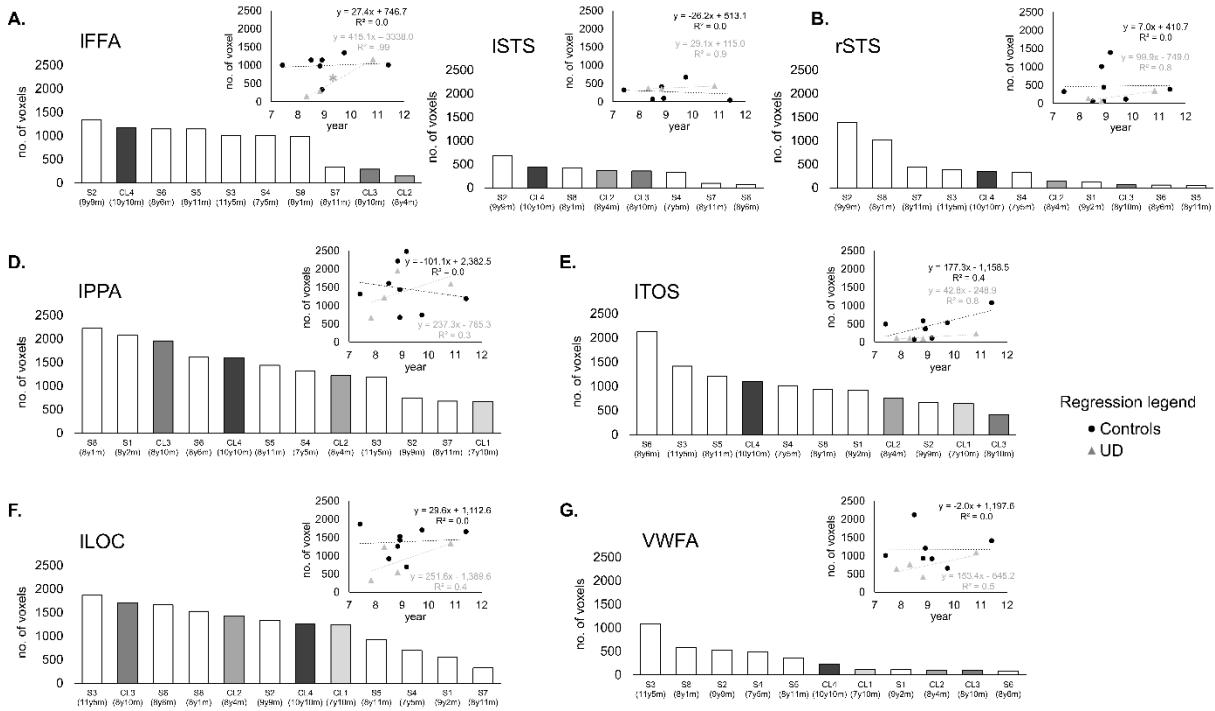

Figure S2. Extent of activation in controls and UD in A) IFFA, B) ISTS, C) rSTS, D) IPPA, E) ITOS, F) ILOC, and G) VWFA. Related to Figures 2 and 3.

Bar chart (main figure): Number of voxels in individual controls (white) and UD (different shades of grey for different sessions). Each white bar reflects data from a single control participant. The X-axis is ranked in descending order of age to indicate where UD falls in the control distribution. Scatter plot (secondary figure, top right corner): Linear regression showing the relationship between age (X-axis) and the extent of activation (Y-axis: number of voxels) in the controls (black dots, regression lines, equations and R-squared values) and in UD (grey triangles, regression lines, equations and R-squared values). An asterisk (dark grey) is above the slope when there is a significant linear relationship (IFFA).

The number of regions defined in controls<sup>1</sup>: IFFA (n=7), ISTS (n=5), rSTS (n=8), IPPA (n=8), ITOS (n=7), ILOC (n=8), and VWFA (n=7).

<sup>1</sup> Note that here the regions were defined using all available runs, whereas the ROIs used to quantify the magnitude of selectivity were defined from the first run in each subject.

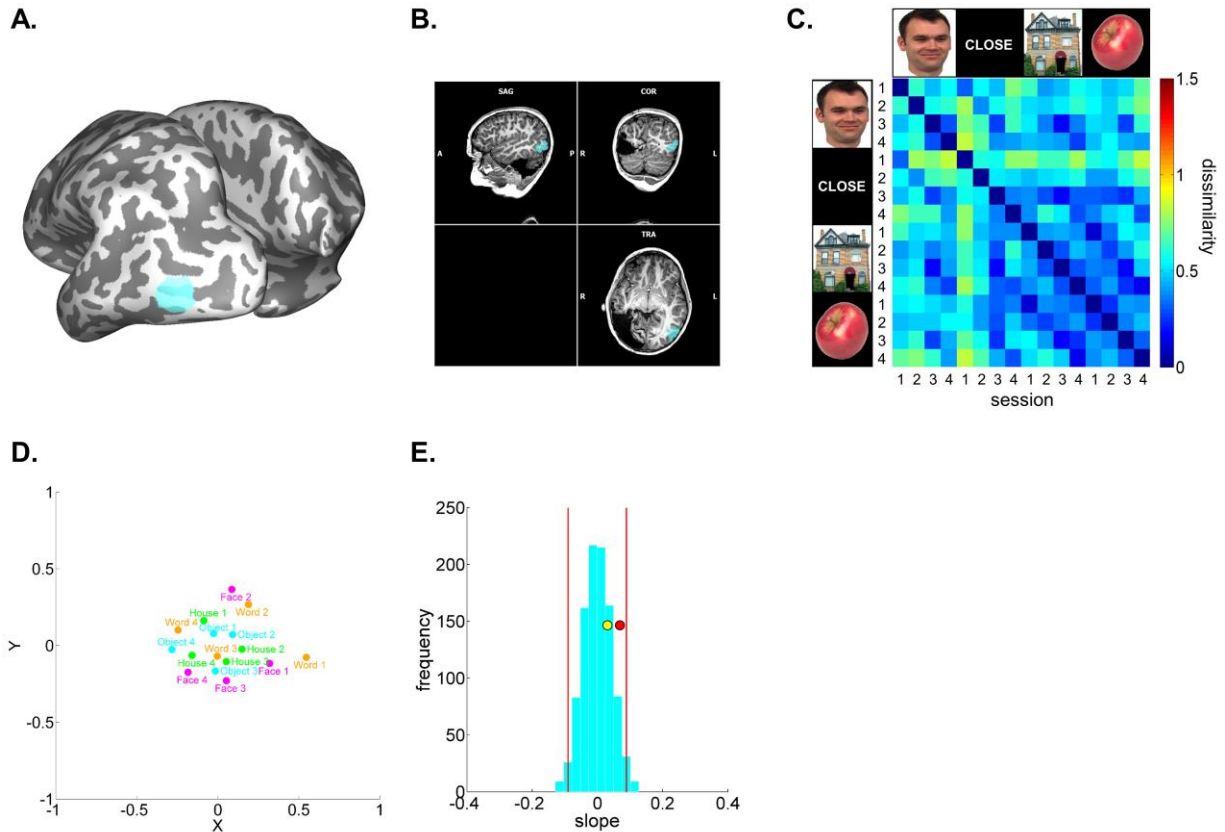

Figure S3. Results from the control anatomical ROI (LO2) analysis. Related to Figure 4.  
 (A) LO2 (cyan) in the surface space (based on LO2 in Wang et al. 2015).  
 (B) LO2 (cyan) in the corresponding volume space.  
 (C) Representational dissimilarity of category representations across sessions in the LO2 region.  
 (D) MDS plot of category representations across sessions in the LO2 region. Orange: words, Pink: faces, Green: houses, Blue: objects.  
 (E) A distribution of bootstrapped dissimilarity slopes (cyan histogram), face and word dissimilarity slope (red dot), and house and object dissimilarity slope (yellow dot) as a function of session. Red vertical lines represent 95% CI.

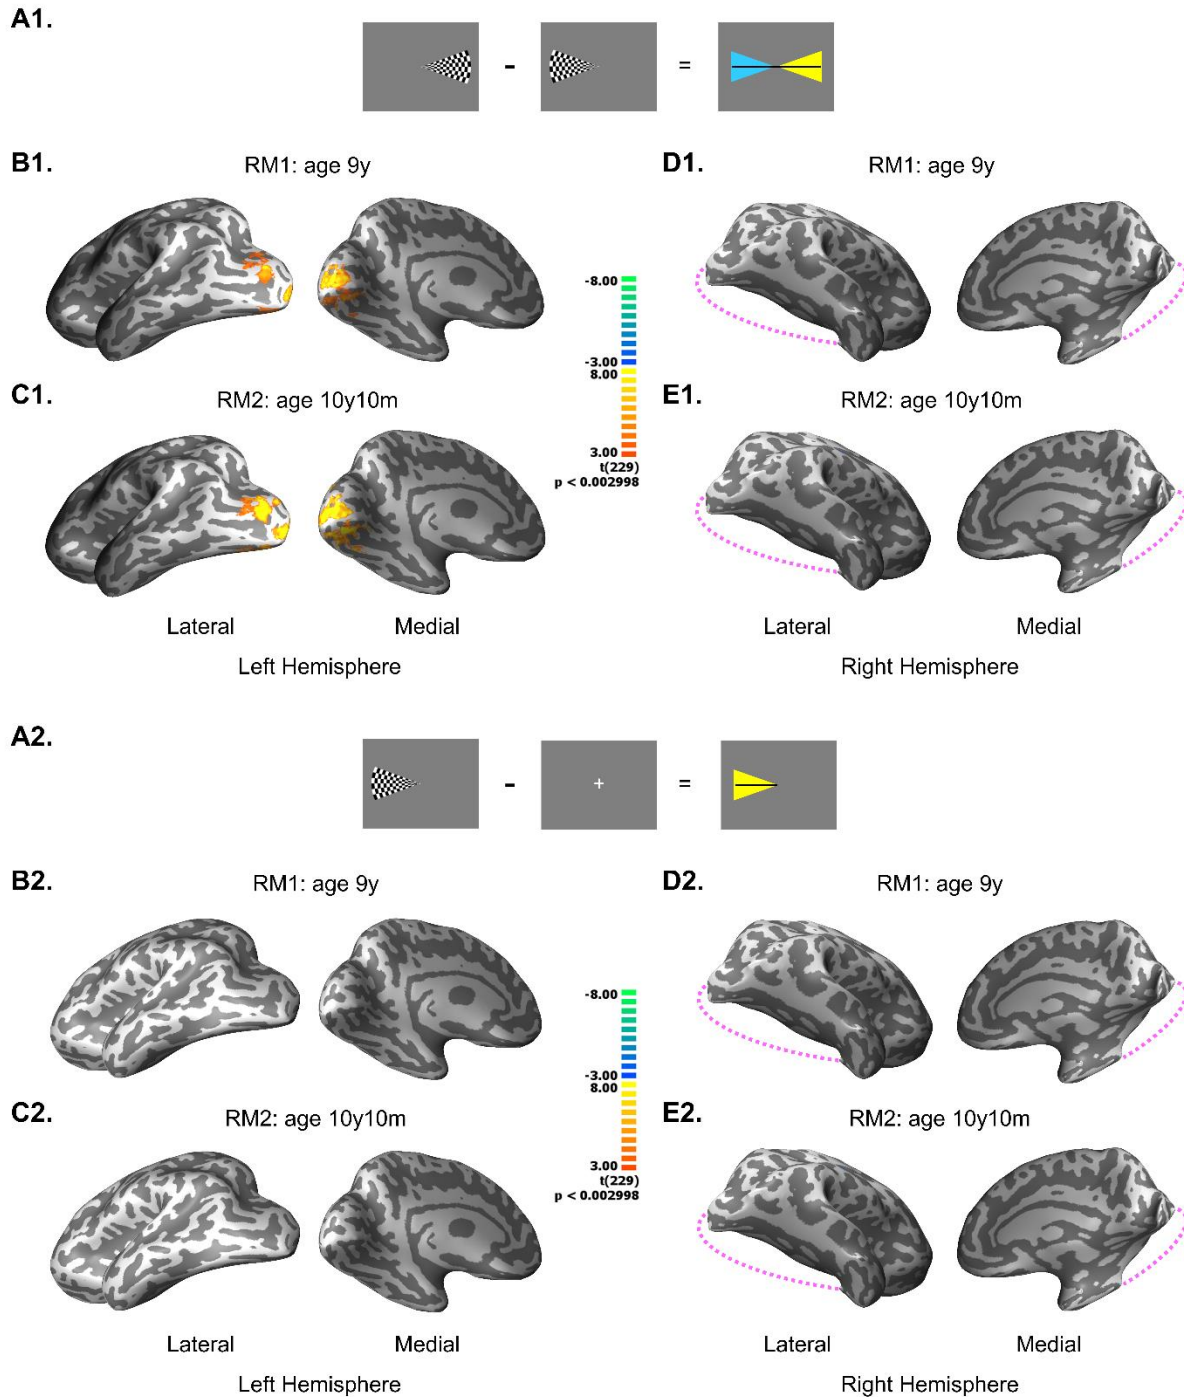

Figure S4. Early visual cortex activation under the RVF-LVF contrast (A1-E1) and the LVF-fixation contrast (A2-E2) in the left and right hemispheres of UD in RM1 (age 9y) and RM2 (age 10y10m). Related to Figure 5.

(A1) Stimuli and contrasts used in the retinotopic mapping experiment. This image shows a contrast between RVF and LVF (RVF-LVF).

(B2) Retinotopic response in the LH in RM1 (age 9y).

(C2) Retinotopic response in the LH in RM2 (age 10y10m).

(D2) Retinotopic response in the RH in RM1 (age 9y).

(E2) Retinotopic response in the RH in RM2 (age 10y10m).

Stronger responses to stimulation in the RVF are shown in yellow and orange, stronger responses to stimulation in the LVF are shown in blue and green. Color scale bars represent t scores. Note that no activation was found in the RH as reflected by a lack of retinotopic response under the RVF-LVF contrast.

(A2) Stimuli and contrasts used in the retinotopic mapping experiment. This image shows a contrast between LVF and fixation (LVF-fixation).

(B2) Retinotopic response in the LH in RM1 (age 9y).

(C2) Retinotopic response in the LH in RM2 (age 10y10m).

(D2) Retinotopic response in the RH in RM1 (age 9y).

(E2) Retinotopic response in the RH in RM2 (age 10y10m).

Stronger responses to stimulation in the LVF are shown in yellow and orange, stronger responses to stimulation in the fixation are shown in blue and green. Color scale bars represent t scores. Note that no activation was found in either hemisphere reflecting a lack of retinotopic response under the LVF-fixation contrast.

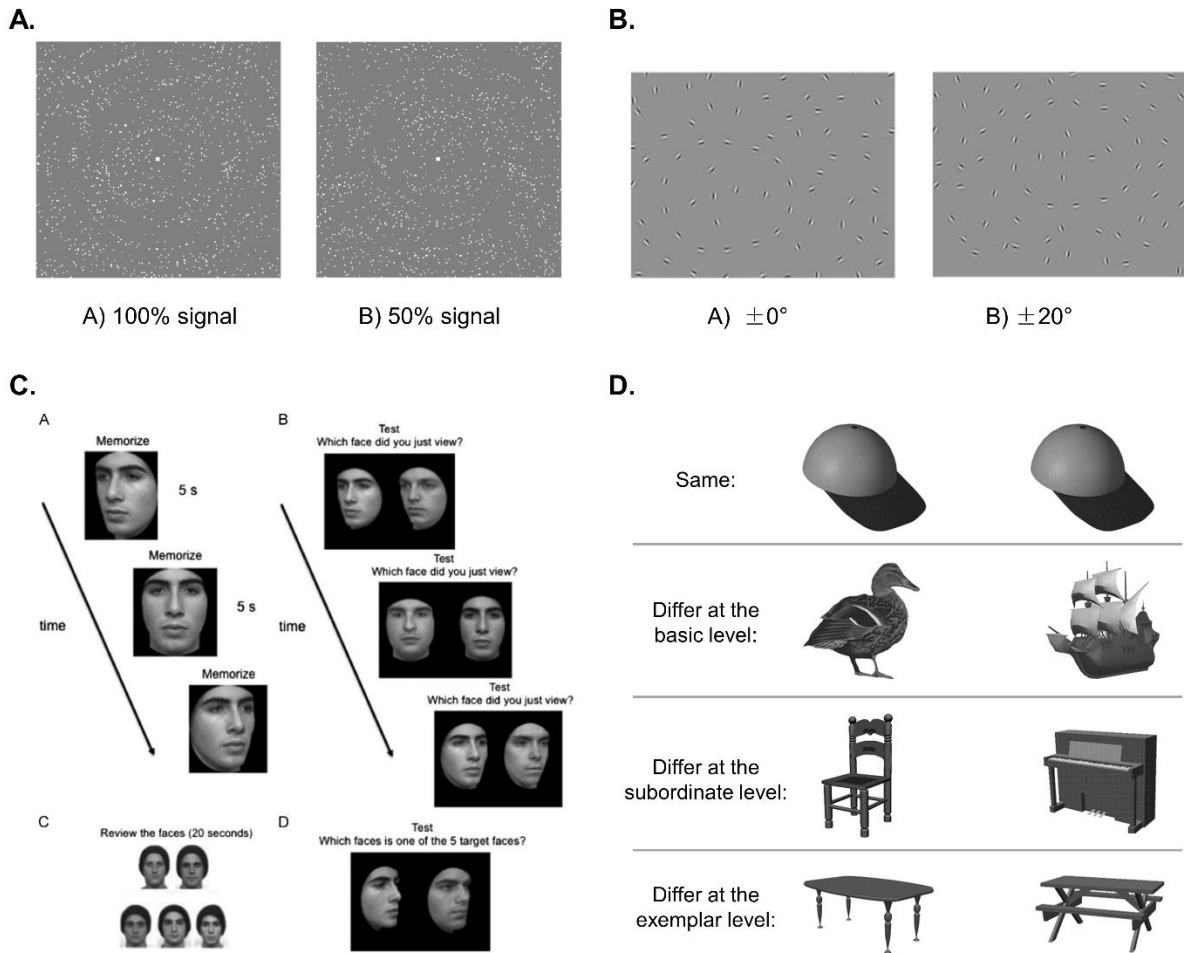

Figure S5. Examples of stimuli in the behavioral experiments. Related to Figure 1.

(A) Glass pattern (Lewis et al., 2002). Participants viewed two sequentially displayed patterns and pressed a button to indicate which display had more concentric swirl.

(B) Contour integration (Hadad et al., 2010). Participants viewed a brief presentation and indicated the leftward or rightward pointing of the embedded “egg-like” shape.

(C) CFMT-C (Croydon et al., 2014). Participants were instructed to remember a set of target faces and identify them amongst distractor faces.

(D) Object Matching Experiment (Gauthier et al., 1999). Participants made same/different discrimination on pairs of objects.

Table S1. Behavioral results of visual perceptual performance in UD and age-matched controls. Related to Figure 1.

|                              |                                  | <b>Participant</b>           | <b>Age</b>   | <b>Version</b>              | <b>Threshold</b>            |                           |
|------------------------------|----------------------------------|------------------------------|--------------|-----------------------------|-----------------------------|---------------------------|
| Intermediate-level vision    | Contour integration <sup>1</sup> | Patient                      | 9y           | ±0 collinearity             | 57.51                       |                           |
|                              |                                  |                              | 9y           | ±20 collinearity            | 76.97                       |                           |
|                              |                                  | Control <sup>1</sup>         | 10y10m       | ±0 collinearity             | 51.96                       |                           |
|                              |                                  |                              | 10y10m       | ±20 collinearity            | 76.88                       |                           |
|                              | Glass pattern <sup>1</sup>       | Patient                      | 7-11y (n=14) | ±0 collinearity             | 60.12 (9.09)                |                           |
|                              |                                  |                              | 7-11y (n=14) | ±20 collinearity            | 74.95 (4.69)                |                           |
|                              |                                  | <b>Participant</b>           | <b>Age</b>   | <b>Threshold (1st time)</b> | <b>Threshold (2nd time)</b> | <b>Average Threshold</b>  |
| High-level vision            | CFMT-C <sup>2</sup>              | Patient                      | 9y           | 33.33                       | 34.17                       | 33.75 (0.59)              |
|                              |                                  |                              | 10y10m       | 25.83                       | 27.5                        | 26.67 (1.18)              |
|                              |                                  | Control <sup>1</sup>         | 7-11y (n=14) | 49.52 (8.58)                | 41.31 (7.13)                | 45.42 (6.53)              |
|                              |                                  |                              |              |                             | <b>Participant</b>          | <b>Age</b>                |
|                              | High-level vision                | Object Matching <sup>1</sup> | Patient      | 9y                          | upright                     | 76.67                     |
|                              |                                  |                              |              | 9y                          | inverted                    | 58.33                     |
| Control <sup>2</sup>         |                                  |                              | 10y10m       | upright                     | 83.33                       |                           |
|                              |                                  |                              | 10y10m       | inverted                    | 68.33                       |                           |
| CFMT-C <sup>2</sup>          |                                  | Patient                      | 9y (n=33)    | upright                     | 81.6 (9.0)                  |                           |
|                              |                                  |                              | 9y (n=33)    | inverted                    | 67.9 (6.1)                  |                           |
|                              |                                  | Control <sup>2</sup>         | 11y (n=29)   | upright                     | 83.2 (9.2)                  |                           |
|                              |                                  |                              | 11y (n=29)   | inverted                    | 74.2 (9.1)                  |                           |
|                              |                                  | <b>Participant</b>           | <b>Age</b>   | <b>Accuracy (% correct)</b> | <b>RT (ms)</b>              | <b>Inverse efficiency</b> |
| Object Matching <sup>1</sup> | Patient                          | 9y                           | 89           | 993.99                      | 1116.84                     |                           |
|                              |                                  | 10y10m                       | 91           | 1366.96                     | 1502.15                     |                           |
|                              | Control <sup>1</sup>             | 7-11y (n=14)                 | 88.57 (5.9)  | 1218.29 (338.17)            | 1366.42 (320.95)            |                           |

<sup>1</sup> Each age-matched control participated in all of the three following tests: Object Matching, Contour Integration, and Glass Pattern.

<sup>2</sup> CFMT-C control scores per age group were based on those from the typical developing children reported in (Croydon et al., 2014).



Table S2. Summary of UD's scholastic performance and neuropsychological evaluation test performance before and after the surgery. Related to Figure 1.

| Scholastic performance                                                                                                          |                      |               |                       |                                                             |                             |                       |             |
|---------------------------------------------------------------------------------------------------------------------------------|----------------------|---------------|-----------------------|-------------------------------------------------------------|-----------------------------|-----------------------|-------------|
| Woodcock-Johnson – III Test of Achievement<br>(Pre-surgery)                                                                     |                      |               |                       | Pennsylvania Systems of School Assessment<br>(Post-surgery) |                             |                       |             |
| Subject                                                                                                                         | Reading              | Letter-Word   | Passage               | Calculation                                                 | Subject                     | English Language Arts | Mathematics |
| Percentile                                                                                                                      | 63rd                 | 67th          | 56th                  | 91st                                                        | Standard score <sup>1</sup> | 1028/1586             | 1094/1594   |
|                                                                                                                                 |                      |               |                       |                                                             | Evaluation                  | Proficient            | Proficient  |
| General Intellectual Function<br>Wechsler Abbreviated Scales of Intelligence (WASI-2)                                           |                      |               |                       |                                                             |                             |                       |             |
|                                                                                                                                 | Pre-surgery          |               |                       | Post-surgery                                                |                             |                       |             |
| Indices                                                                                                                         | Full Scale           | Verbal        | Performance           | Full Scale                                                  | Verbal                      | Performance           |             |
| Standard score <sup>1</sup>                                                                                                     | 116                  | 135           | 97                    | 118                                                         | 123                         | 108                   |             |
| Descriptive                                                                                                                     | High average         | Very superior | Average               | Superior                                                    | Superior                    | Average               |             |
| Language                                                                                                                        |                      |               |                       |                                                             |                             |                       |             |
|                                                                                                                                 | WASI-2 (Pre-surgery) |               |                       | NEPSY-II (Post-surgery)                                     |                             |                       |             |
| Subtest                                                                                                                         | Vocabulary           |               |                       | Subtest                                                     | Comprehension               | Semantic              | Phonemic    |
| Scaled score <sup>2</sup>                                                                                                       | 15                   |               |                       | Scaled score <sup>2</sup>                                   | 11                          | 17                    | 17          |
| Descriptive                                                                                                                     | High average         |               |                       | Percentile                                                  | 63rd                        | 99th                  | 99th        |
| Fine Motor/ Visual-Motor Integration<br>Grooved Pegboard                                                                        |                      |               |                       |                                                             |                             |                       |             |
|                                                                                                                                 | Pre-surgery          |               |                       | Post-surgery                                                |                             |                       |             |
| Hand                                                                                                                            | Dominant Hand (RH)   |               | Nondominant Hand (LH) | Dominant Hand (RH)                                          |                             | Nondominant hand (LH) |             |
| Time                                                                                                                            | 97"                  |               | 51"                   | 38"                                                         |                             | 50"                   |             |
| Percentile                                                                                                                      | 7th                  |               | 53rd                  | 50th                                                        |                             | 26th                  |             |
| Executive Control Processes<br>Wechsler Intelligence Scale for Children (WISC-V)                                                |                      |               |                       |                                                             |                             |                       |             |
|                                                                                                                                 | Pre-surgery          |               |                       | Post-surgery                                                |                             |                       |             |
| Indices                                                                                                                         | Working Memory       |               | Processing Speed      | Working Memory                                              |                             | Processing Speed      |             |
| Standard score <sup>1</sup>                                                                                                     | 80                   |               | 106                   | 94                                                          |                             | 95                    |             |
| Percentile                                                                                                                      | 9th                  |               | 66th                  | 34th                                                        |                             | 37th                  |             |
| Descriptive                                                                                                                     | Weak                 |               | Average               | Average                                                     |                             | Average               |             |
| <sup>1</sup> Standard score: Mean =100, Standard Deviation = 15<br><sup>2</sup> Scaled score: Mean = 10, Standard Deviation = 3 |                      |               |                       |                                                             |                             |                       |             |
